# Supplementary material
Source: Springer Nature journal article supplement (https://www.springermedizin.de/resource/supplementary/13063_2009_407_MOESM1_ESM.pdf/9617924)
Supplement: MOESM1 [file 9617924]

Diabetes Clinics screen for eligibility of their patients and invite them to participate

Refuse to participate

Informed consent, data collection

**RANDOMIZATION**

Exercise tolerance testing

Treatment of Traditional Risk Factors

Test negative or incomplete

Test positive

Refuse angiography

Coronary angiography

Coronary stenosis

No coronary stenosis

Revascularization

FOLLOW UP
